# Supplementary material
Source: PubMed Central journal article supplement (PMC11028239)

## Supplementary material

**Supplementary Table 1: Activity matrix of TCT process**

| Day | Activity                                                                                     | Volume [ml]                |
|-----|----------------------------------------------------------------------------------------------|----------------------------|
| 0   | CD4/8 separation                                                                             |                            |
|     | Activation (CD3/CD28)                                                                        |                            |
|     | 01:00 p.m. Start of culture                                                                  | 70                         |
| 1   | 10:00 a.m. Transduction with lentiviral vector ( $2 \times 10^8$ viral particles per 100 ml) | +30 → 100                  |
| 2   | 05:00 p.m. Culture wash                                                                      | Complete replacement → 200 |
|     | 06:00 p.m. Activate shaker type I                                                            |                            |
| 5   | 10:00 a.m. Feed                                                                              | +50 → 250                  |
| 6   | 02:00 p.m. Medium exchange                                                                   | 125/125 → 250              |
| 8   | 02:00 p.m. Medium exchange                                                                   | 150/150 → 250              |
|     | 03:00 p.m. Activate shaker type III                                                          |                            |
| 10  | 02:00 p.m. Medium exchange                                                                   | 180/180 → 250              |
| 12  | 09:00 a.m. Harvest, end of culture                                                           |                            |

**Supplementary Table 2: Viral concentration, MOI and T-cell transduction rate of patient runs CAR001-004**

| Run    | Concentration [viral particles/ml] | MOI [viral particles/ T cell] | T-cell transduction rate day 12 [%] |
|--------|------------------------------------|-------------------------------|-------------------------------------|
| CAR001 | 2x10 <sup>6</sup>                  | 11.49                         | 40.4                                |
| CAR002 | 2x10 <sup>6</sup>                  | 4.1                           | 19.6                                |
| CAR003 | 2x10 <sup>6</sup>                  | 5.18                          | 19.3                                |
| CAR004 | 2x10 <sup>6</sup>                  | 21.37                         | 28.5                                |

**Supplementary Figure 1:** CAR<sup>+</sup> NKT cells were analyzed for their CD4 and CD8 expression by flow cytometry at the end of the process.

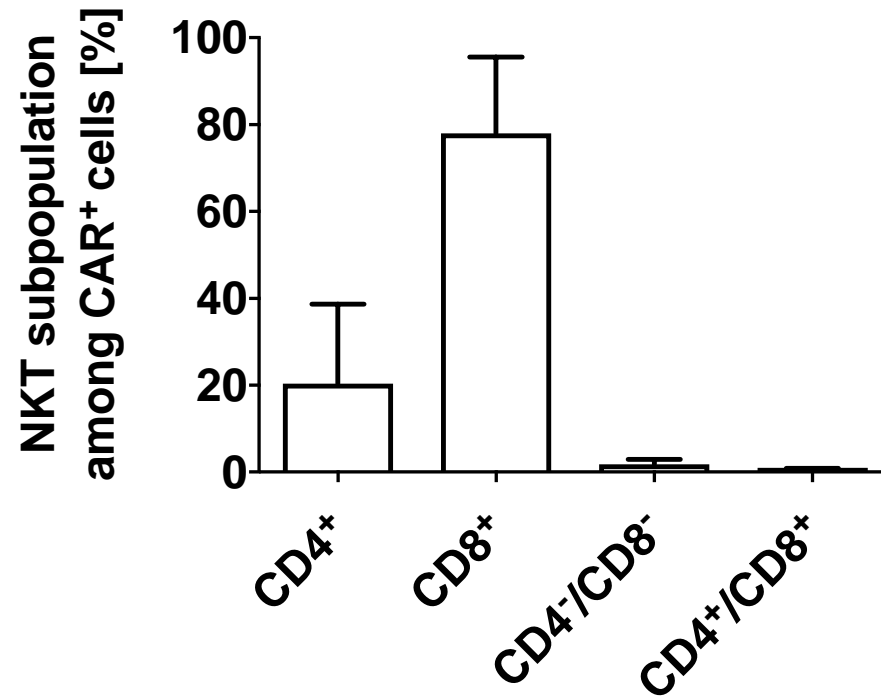

**Supplementary Figure 2:** The negative fraction after CD4/8 separation of initial blood product CAR003 was analyzed by flow cytometry and then used for the flow cytometry-based cytokine release assay shown in [Figure 6](#).

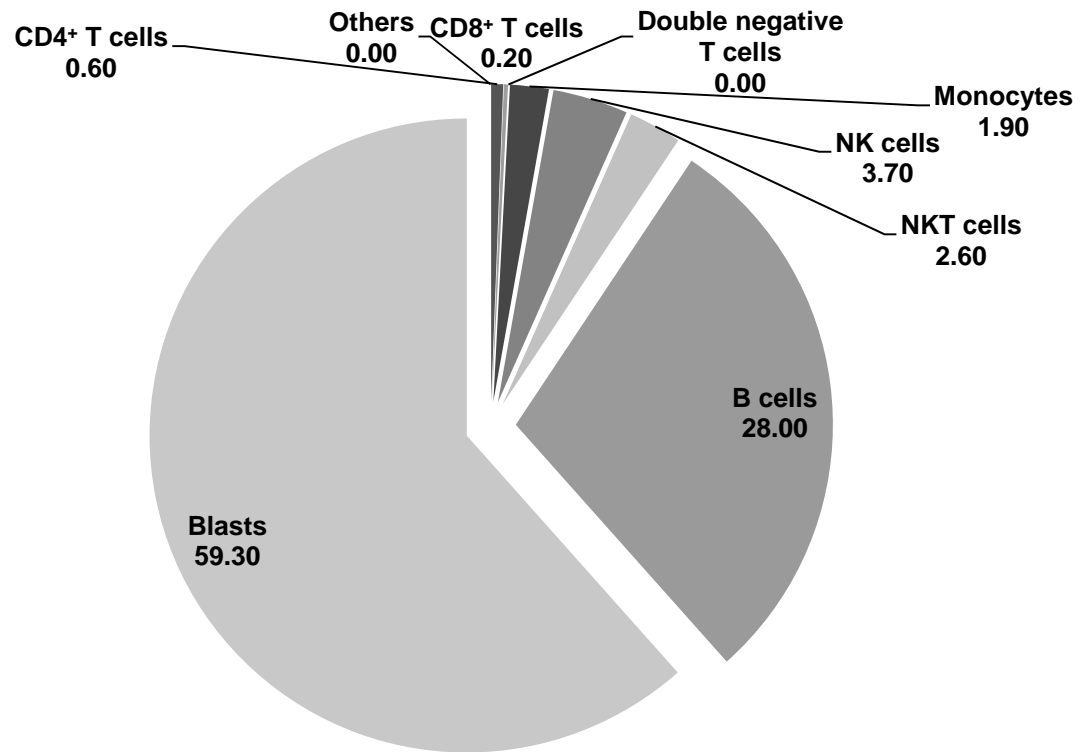

**Supplementary Figure 3:** Impact of CD4/CD8 separation on cellular composition, expansion, transduction and T-cell phenotype. **a** Cellular composition of unsorted PBMCs and CD4/CD8-sorted cells derived from healthy donors was analyzed by flow cytometry on day 0. **b-c** No significant difference in expansion behavior and transduction rate was found after 12 days of small scale culture. **d** T-cell phenotype on day 12 showed no significant difference. Statistical significance was determined by two-tailed paired T test.

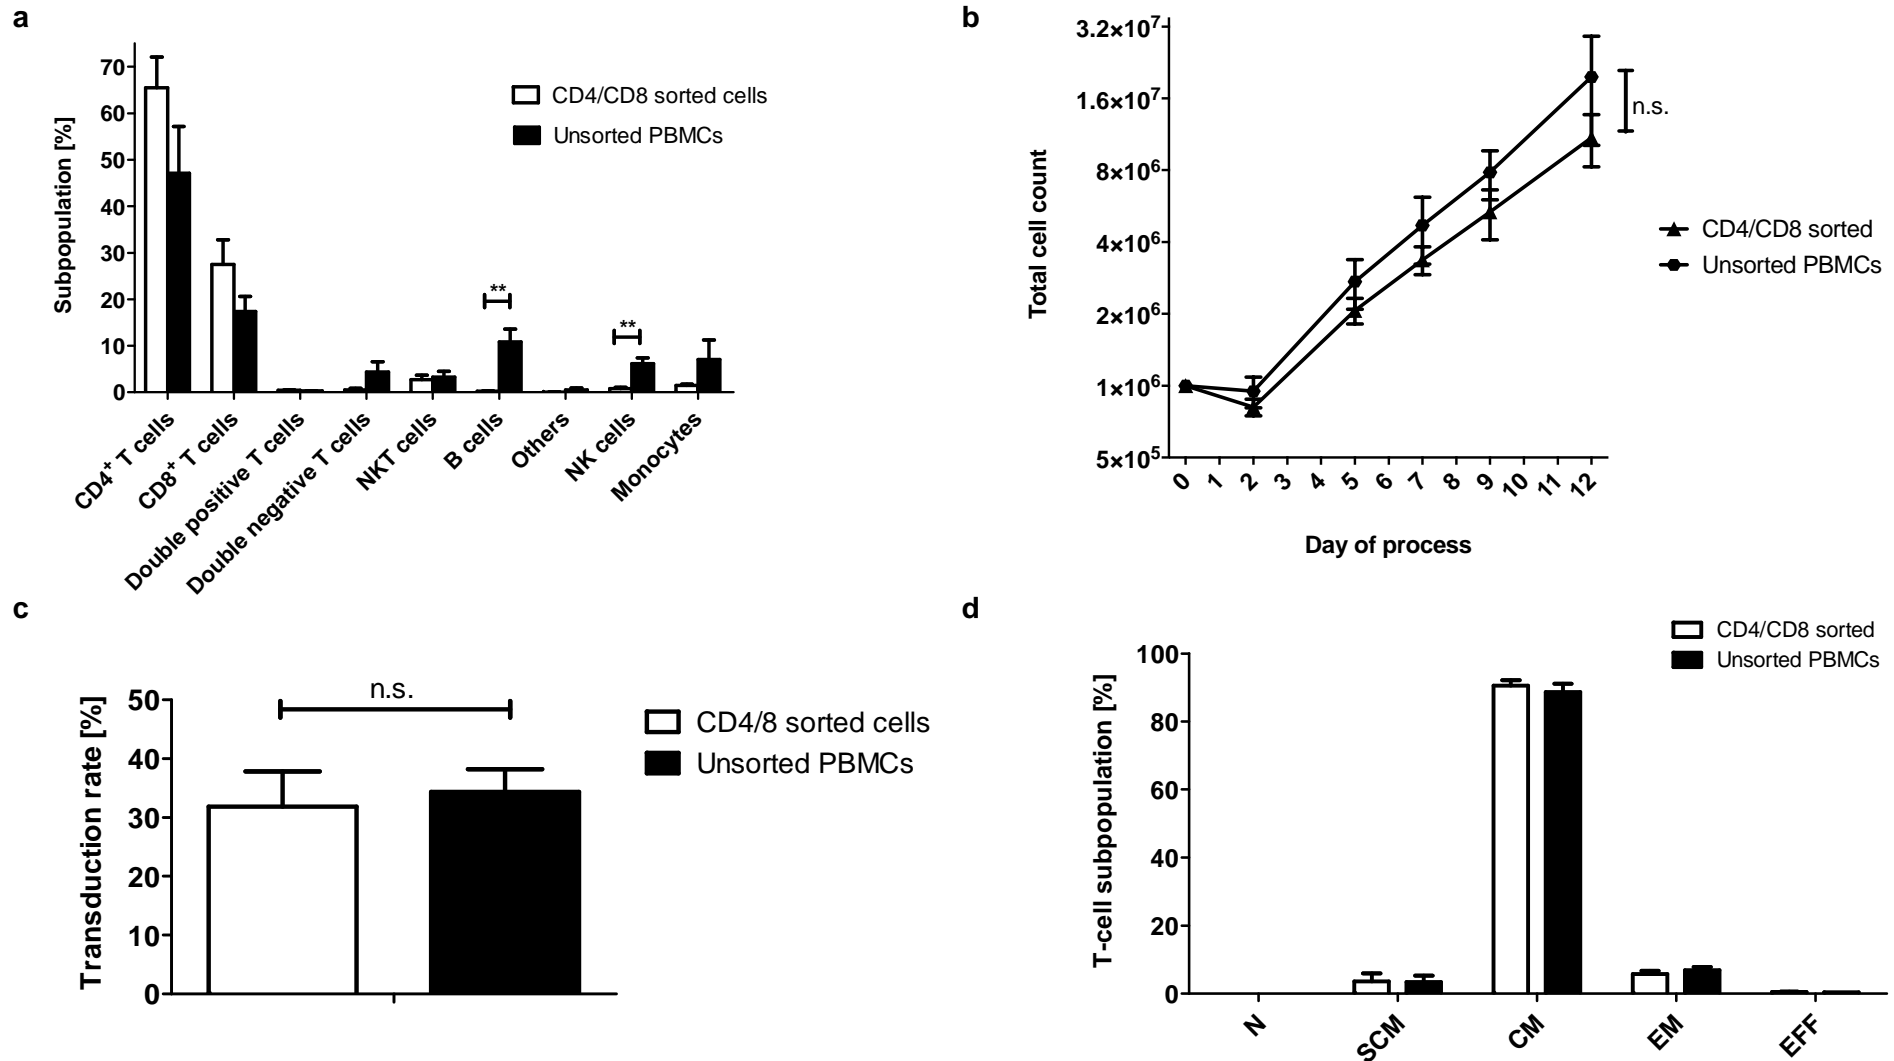

**Supplementary Figure 4:** **a** Flow cytometry-based gating strategy to determine cellular composition and exemplary plots of the starting fraction, **b** the positive fraction after CD4/CD8 separation, **c** the negative fraction after CD4/CD8 separation and **d** the composition of the final product. For figure part b, c and d, lymphocytes + monocytes and single cells were gated in analogy to part a.

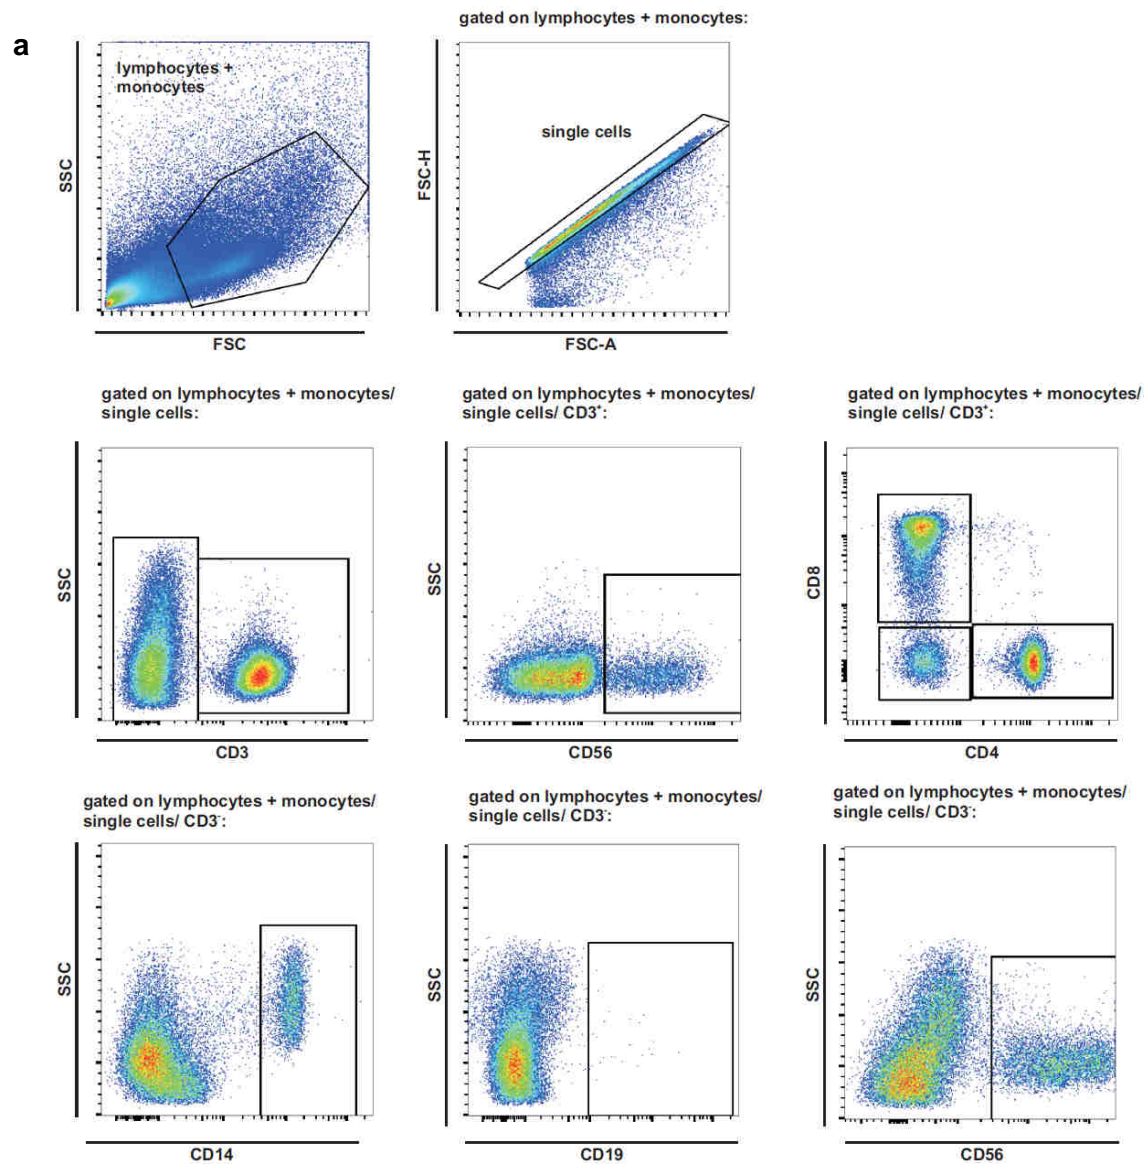

**b** gated on lymphocytes + monocytes/  
single cells:

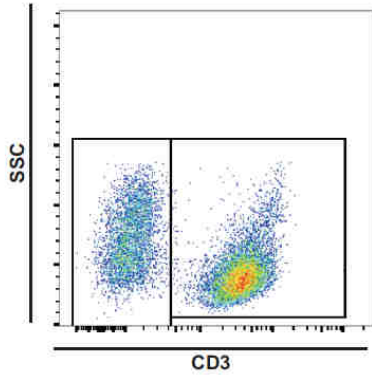

gated on lymphocytes + monocytes/  
single cells/ CD3<sup>+</sup>:

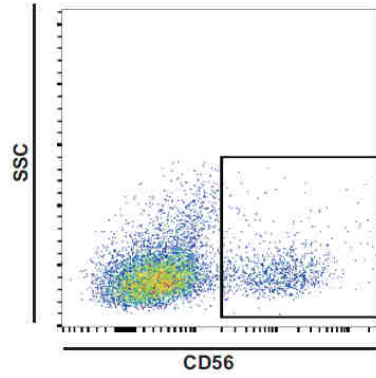

gated on lymphocytes + monocytes/  
single cells/ CD3<sup>+</sup>:

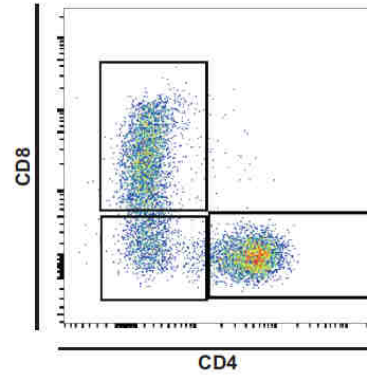

gated on lymphocytes + monocytes/  
single cells/ CD3<sup>+</sup>:

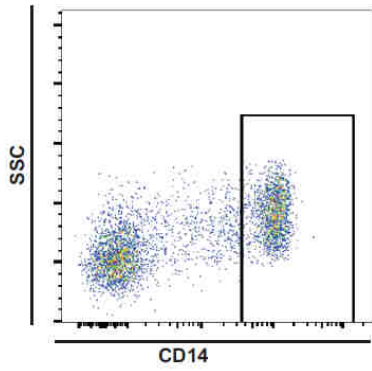

gated on lymphocytes + monocytes/  
single cells/ CD3<sup>+</sup>:

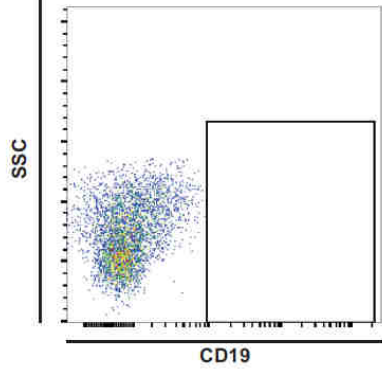

gated on lymphocytes + monocytes/  
single cells/ CD3<sup>+</sup>:

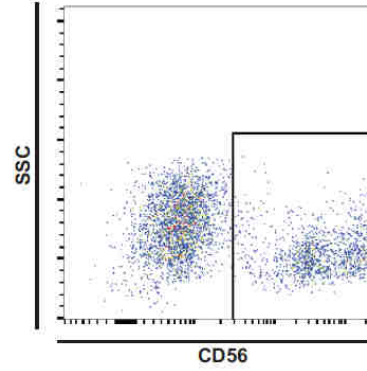

**C**

gated on lymphocytes + monocytes/  
single cells:

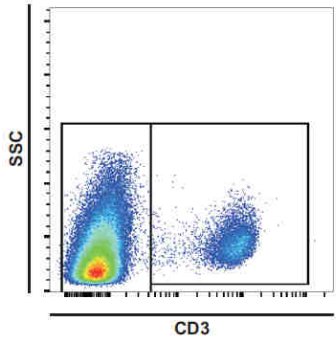

gated on lymphocytes + monocytes/  
single cells/ CD3<sup>+</sup>:

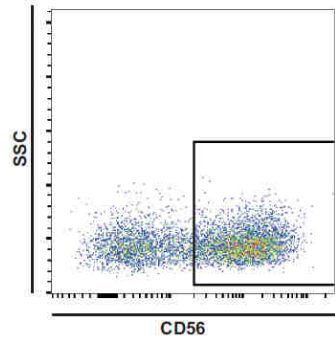

gated on lymphocytes + monocytes/  
single cells/ CD3<sup>+</sup>:

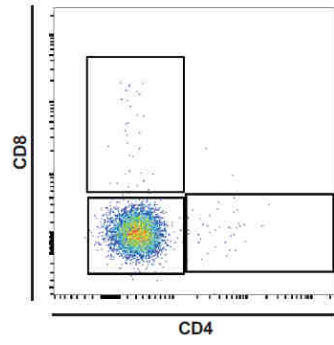

gated on lymphocytes + monocytes/  
single cells/ CD3<sup>+</sup>:

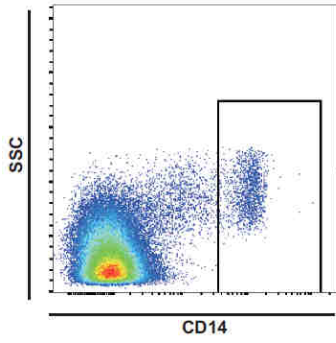

gated on lymphocytes + monocytes/  
single cells/ CD3<sup>+</sup>:

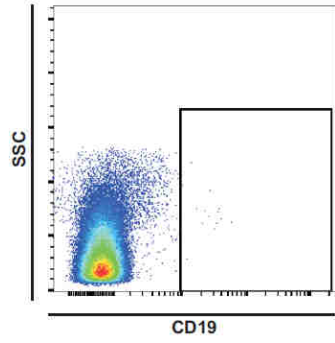

gated on lymphocytes + monocytes/  
single cells/ CD3<sup>+</sup>:

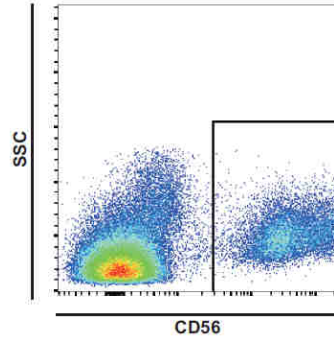



**d**

gated on lymphocytes/ monocytes  
single cells:

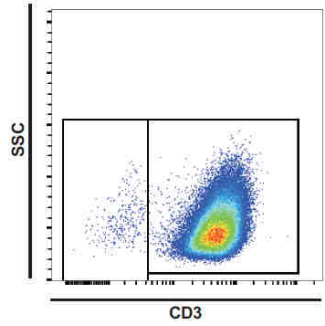

gated on lymphocytes/ monocytes  
single cells/ CD3<sup>+</sup>:

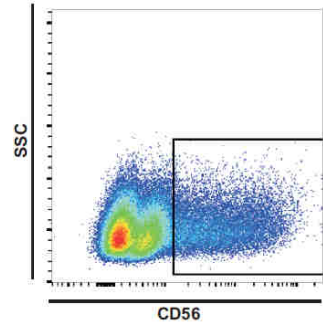

gated on lymphocytes/ monocytes  
single cells/ CD3<sup>+</sup>:

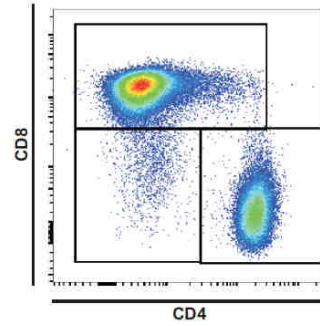

gated on lymphocytes/ monocytes  
single cells/ CD3<sup>+</sup>:

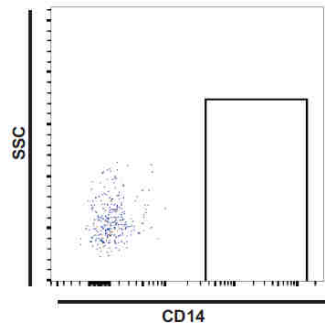

gated on lymphocytes/ monocytes  
single cells/ CD3<sup>+</sup>:

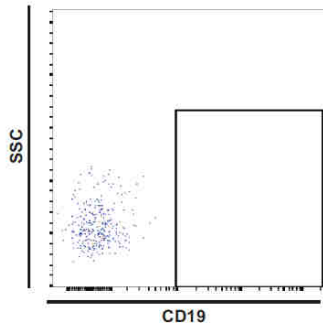

gated on lymphocytes/ monocytes  
single cells/ CD3<sup>+</sup>:

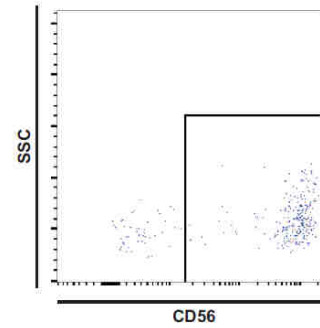

**Supplementary Figure 5:** Flow cytometry-based gating strategy to determine the T-cell phenotype.

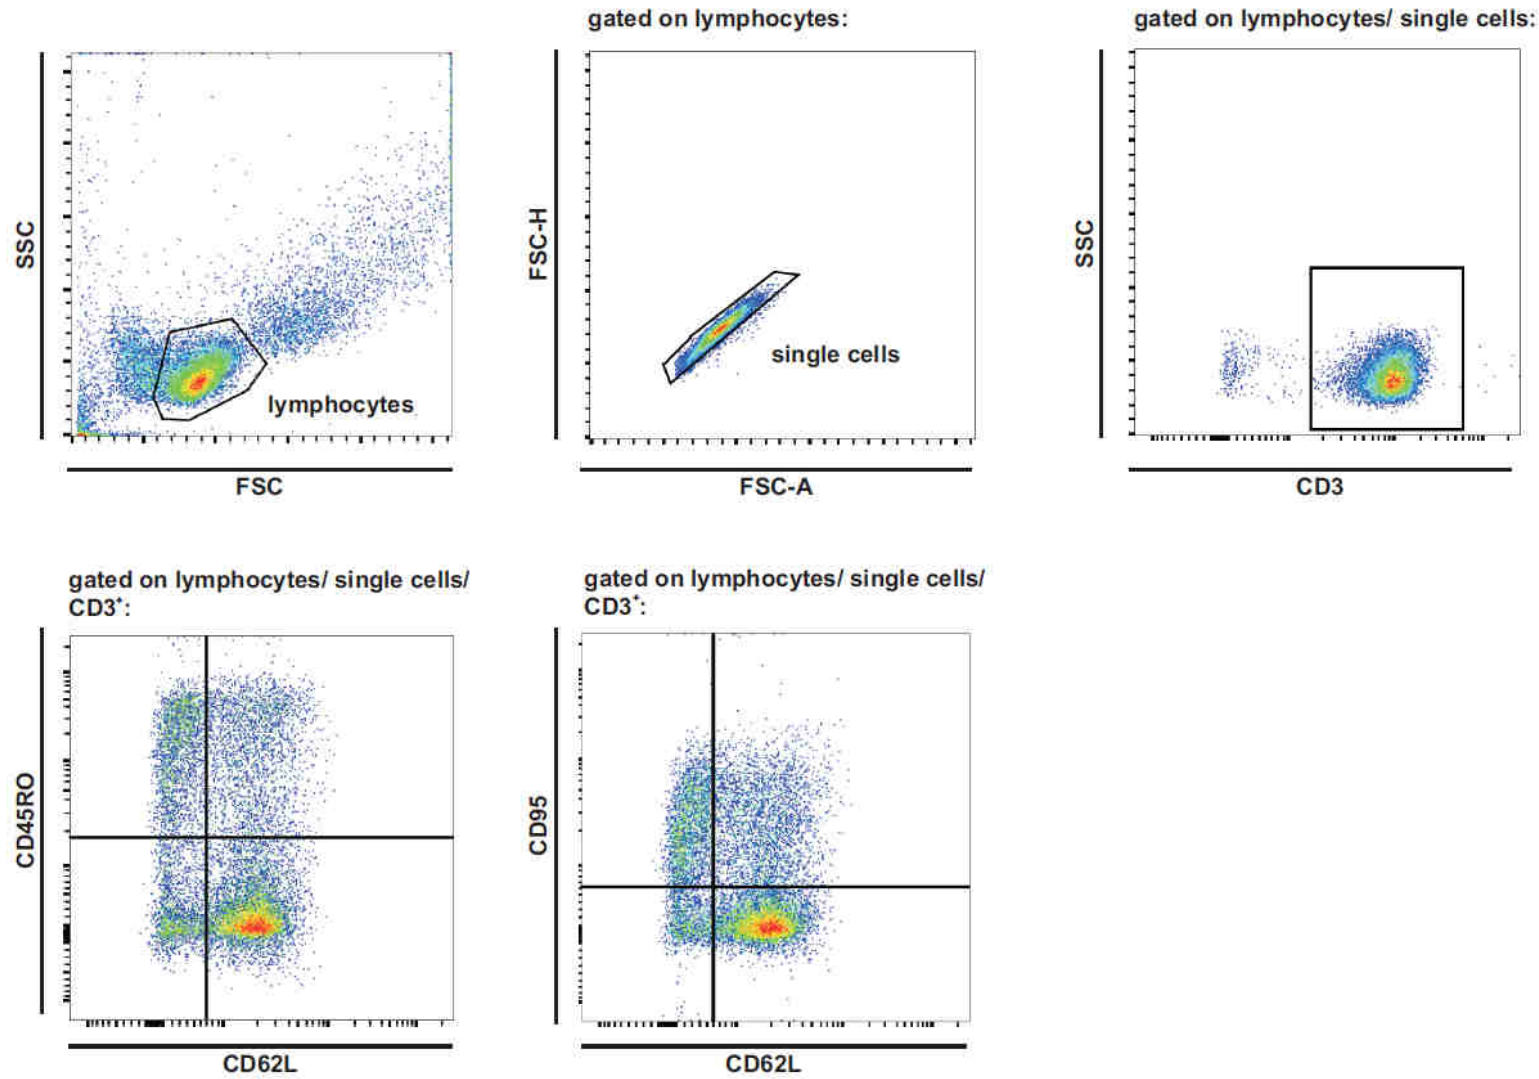

Supplement: 262_2018_2155_MOESM1_ESM.pdf [file 262_2018_2155_MOESM1_ESM.pdf]
